# Supplementary material for: The Calcineurin-FoxO-MuRF1 signaling pathway regulates myofibril integrity in cardiomyocytes
Source: eLife journal article supplement (doi:10.7554/elife.27955), 2017-08-19
Supplement: supp [file elife-27955-supp-v1.zip]

Archive with 4 entries (4 files):
- elife_poa_e27955_Video_2.mp4
- elife_poa_e27955_Transparent_Reporting_File.pdf
- elife_poa_e27955_Video_1.mp4
- elife_poa_e27955_Video_3.mp4
